# Supplementary material for: Micro-flow injection analysis system: on-chip sample preconcentration, injection and delivery using coupled monolithic electroosmotic pumps
Source: Royal Society of Chemistry journal article supplement (doi:10.1039/b707773b), 2007-01-01
Supplement: b707773b.pdf [file b707773b.pdf]

**Fig. S1**(a) Photograph of micro-fluidic chip with encased monolithic EOPs, (b) Schematic diagram of the full apparatus for characterising the  $\mu$ -FIA chip. EOP<sub>a</sub>: preconcentration and injection pump; EOP<sub>b</sub>: carrier pump; Flow sensor: NFS; Detector: C<sup>4</sup>D.

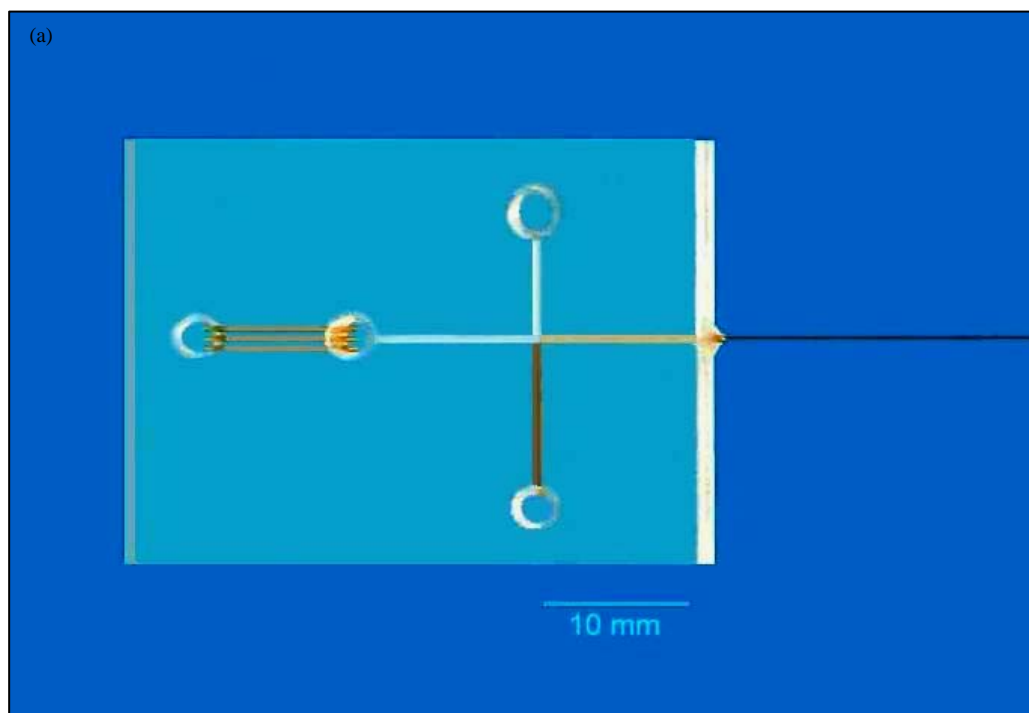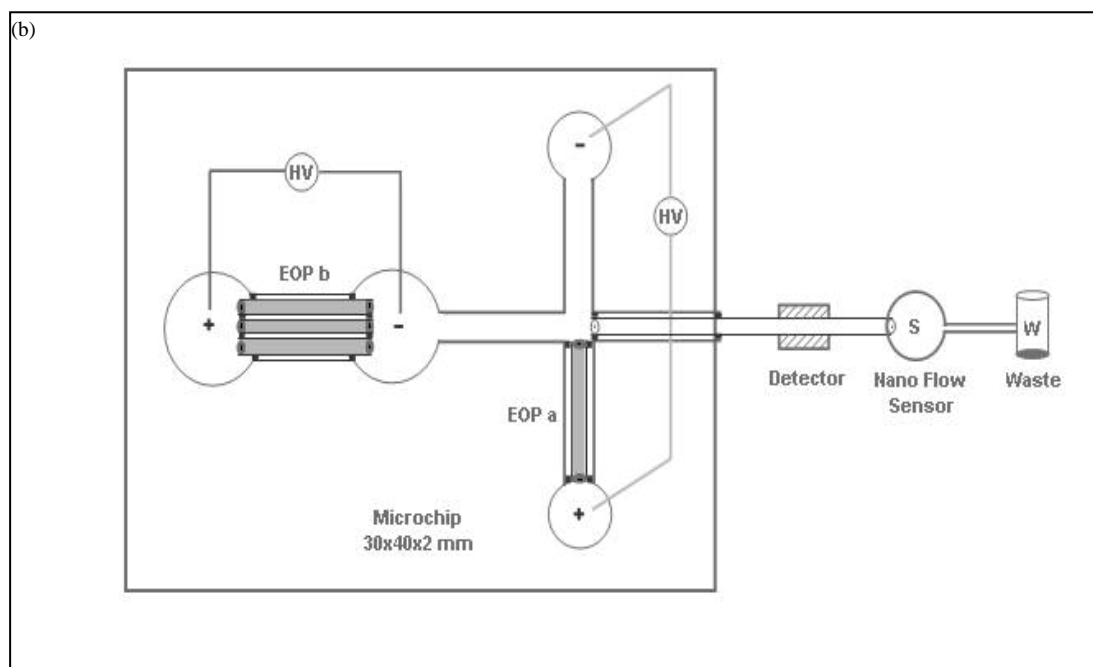

**Fig. S2** Peak profiles for NaCl solution resulting from (a) increasing injection time with  $EOP_a$  and  $EOP_b$  voltages constant; (b) increasing  $EOP_a$  voltage with  $EOP_b$  constant; (c) increasing  $EOP_b$  voltage with  $EOP_a$  constant; (d) increasing sample concentration with  $EOP_a$  and  $EOP_b$  voltages constant. Working fluid in  $EOP_{a,b}$ : sodium chloride solution and DI-water respectively.

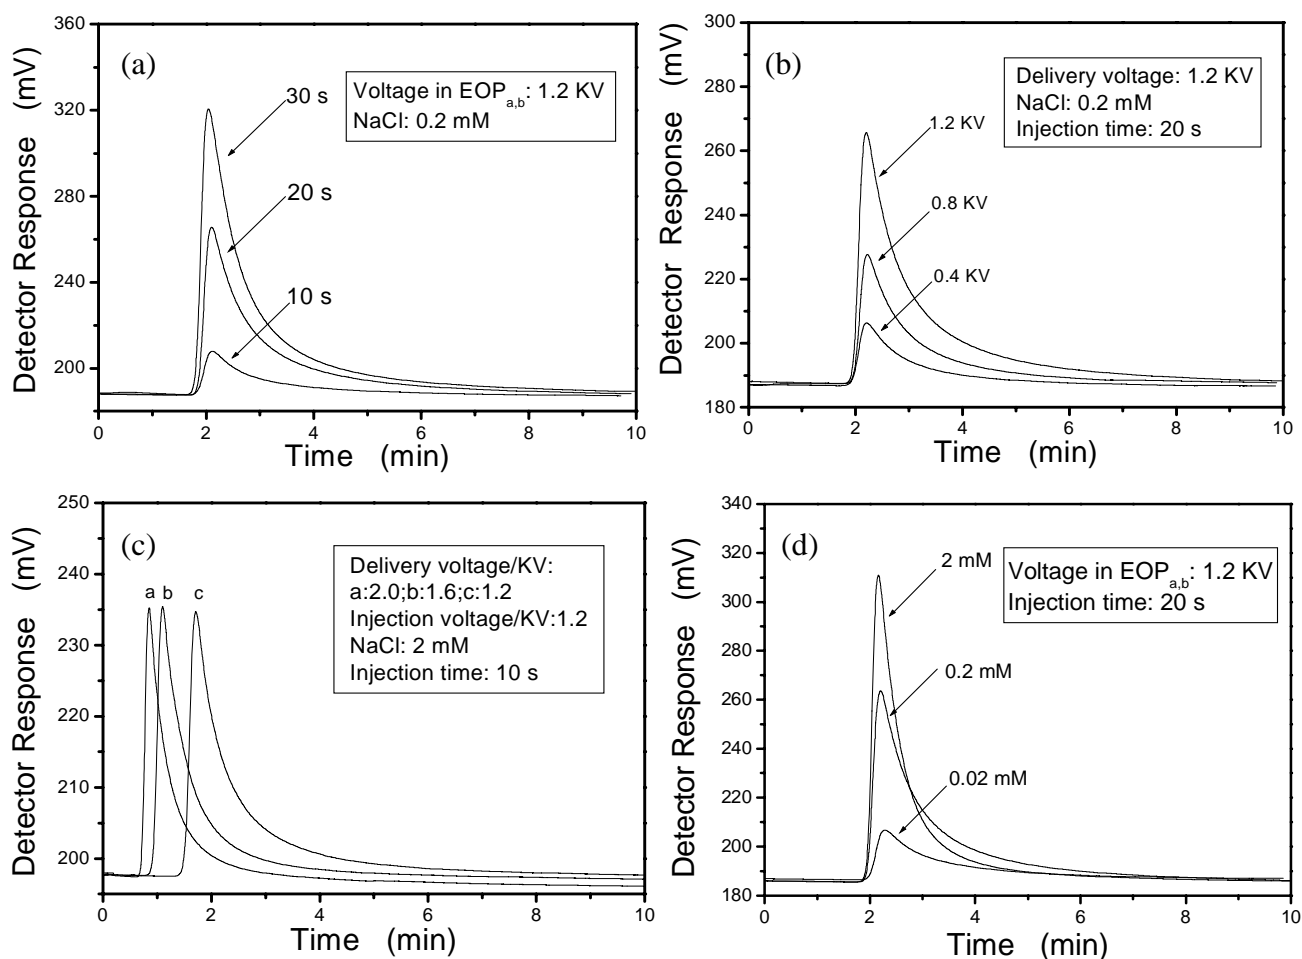

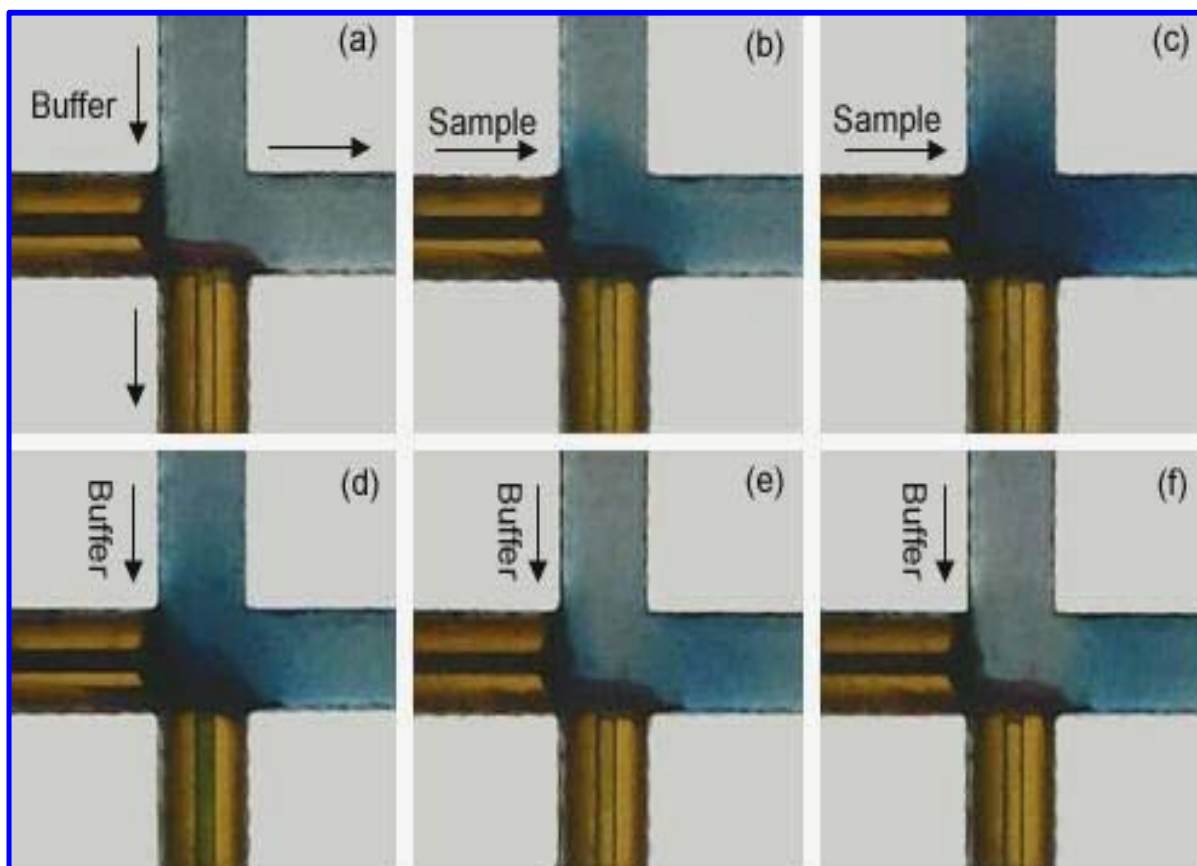

**Fig. S3.** Photographs showing the injection of a blue dye solution using EOP<sub>a</sub> (b-c) followed by delivery into the detector capillary using EOP<sub>b</sub> (d-f). Injection = 10 s at 1.2 kV.
